# Supplementary material for: Hemoglobin variants shape the distribution of malaria parasites in human populations and their transmission potential
Source: PubMed Central journal article supplement (PMC5660173; doi:10.1038/s41598-017-14627-y), 2017-10-27
Supplement: 41598_2017_14627_MOESM1_ESM.pdf [file 41598_2017_14627_MOESM1_ESM.pdf]

# Supplementary Information

## **Manuscript:**

Hemoglobin variants shape the distribution of malaria parasites in human populations and their transmission potential

## **Authors:**

Gonçalves B.P., Sagara I., Coulibaly M., Wu Y., Assadou M.H., Guindo A., Ellis R.D., Diakite M., Gabriel E., Prevots D.R., Doumbo O.K., Duffy P.E.

## Contributions to the reservoir of malaria infections

In **Figure 2**, the relative contributions of individuals with different hemoglobin variants to the reservoir of malaria infection (panels C and D) were estimated as:

$$C_{ijk} = h_i a_j p_{ijk} / \sum_{i=1}^m \sum_{j=1}^n h_i a_j p_{ijk}$$

where  $C_{ijk}$  corresponds to the proportion of infected individuals in the population during month  $k$  with hemoglobin variant  $i$  and age  $j$ ; and  $h_i$  and  $a_j$  represent the proportion of the population with hemoglobin variant  $i$  and in the age category  $j$ , respectively. Demographic data for Sub-Saharan Africa were obtained (World Population Prospects, United Nations; [esa.un.org/wpp/](http://esa.un.org/wpp/)) and used to estimate  $a_j$ . Parasite (asexual or sexual stages) prevalence, based on scheduled visits only, during month  $k$  in individuals with hemoglobin variant  $i$  and in the age category  $j$  is represented by  $p_{ijk}$ .

**Figure S1. Map with location of Bancoumana, Mali.** Map was generated using qGIS version 2.12.0 (<http://www.qgis.org/en/site/>). Country boundaries and river location were obtained from <http://www.gadm.org/> and <https://data.humdata.org>.

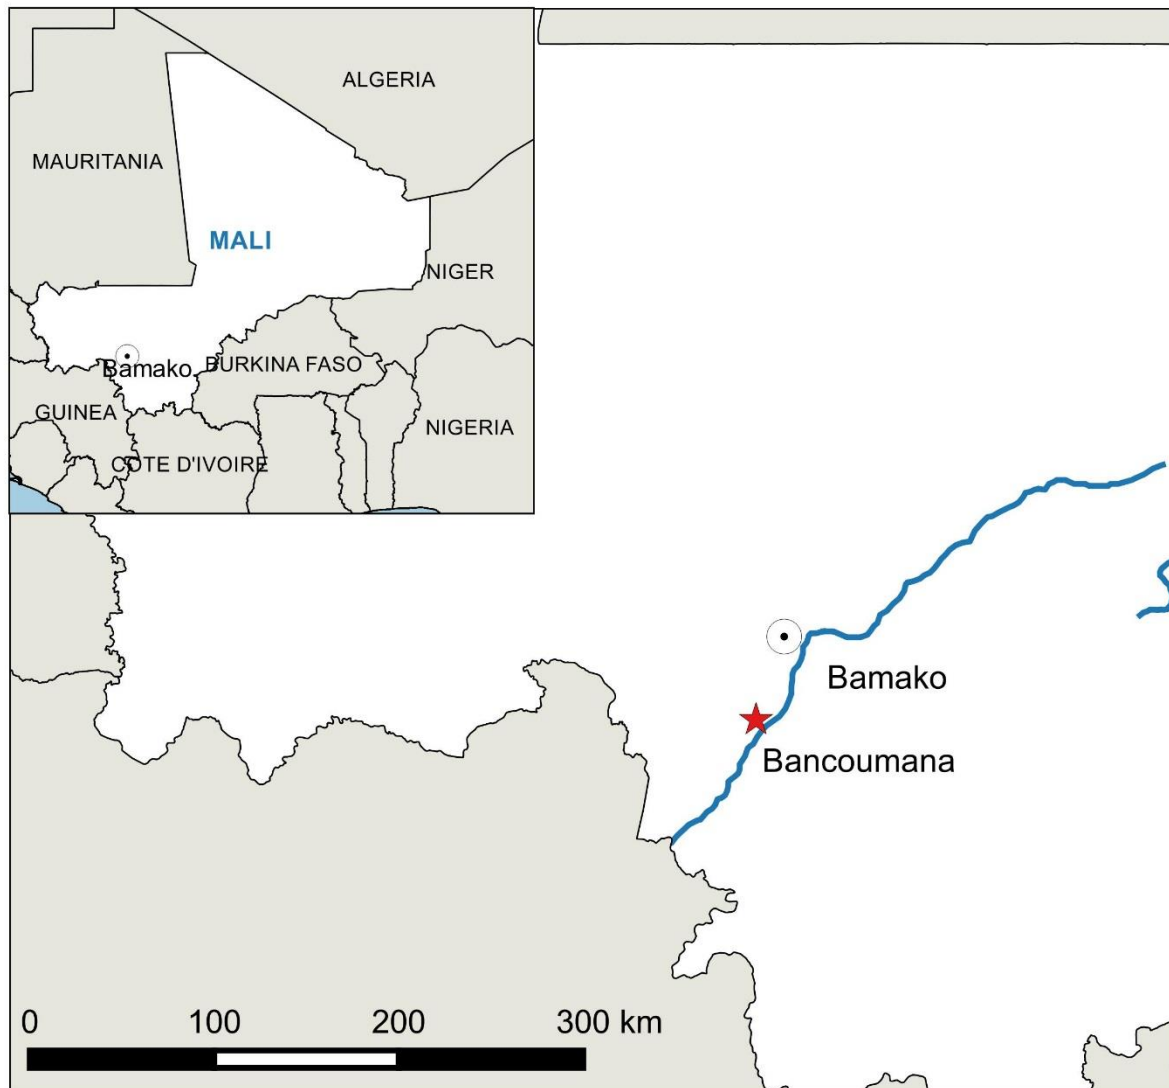

**Figure S2. Age-specific prevalences of asexual (A, C, E) and sexual (B, D, F) stage parasites:** (A, B) children aged 5 years or less; (C, D) children aged between 5 and 15 years; (E, F) adults. Whenever blood smear results were available for less than five individuals during a particular month (Table S6), estimates were not presented. Of note, children aged 5 years or less were not followed after June 2012.

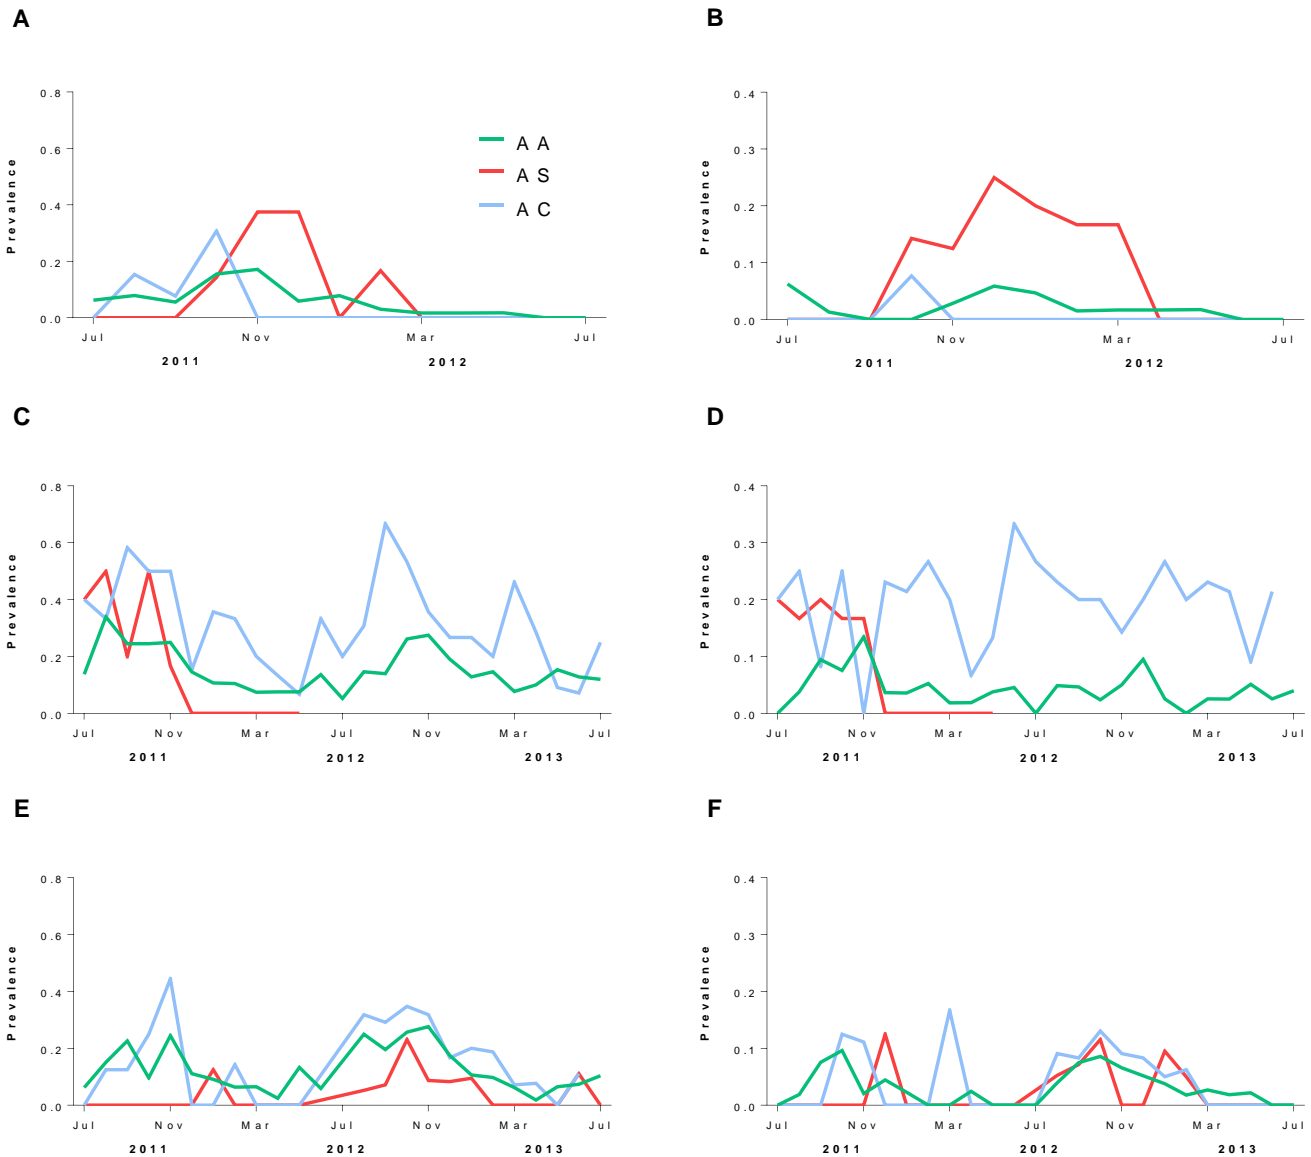

**Figure S3. Long-term carriage of patent gametocytes and its temporal relationship with clinical malaria events in school-aged children.** Scheduled visits with microscopically-detectable gametocytes are presented as green triangles; inverted red triangles correspond to clinical malaria episodes. Yellow squares represent clinical episodes with patent gametocytes on the day of diagnosis. Each line and space between consecutive lines correspond to a study participant's follow-up information. Only children aged 5 – 15 years who carried patent gametocytes at least once during the study or who developed clinical malaria were included in this graph. Dry seasons are represented by light green areas.

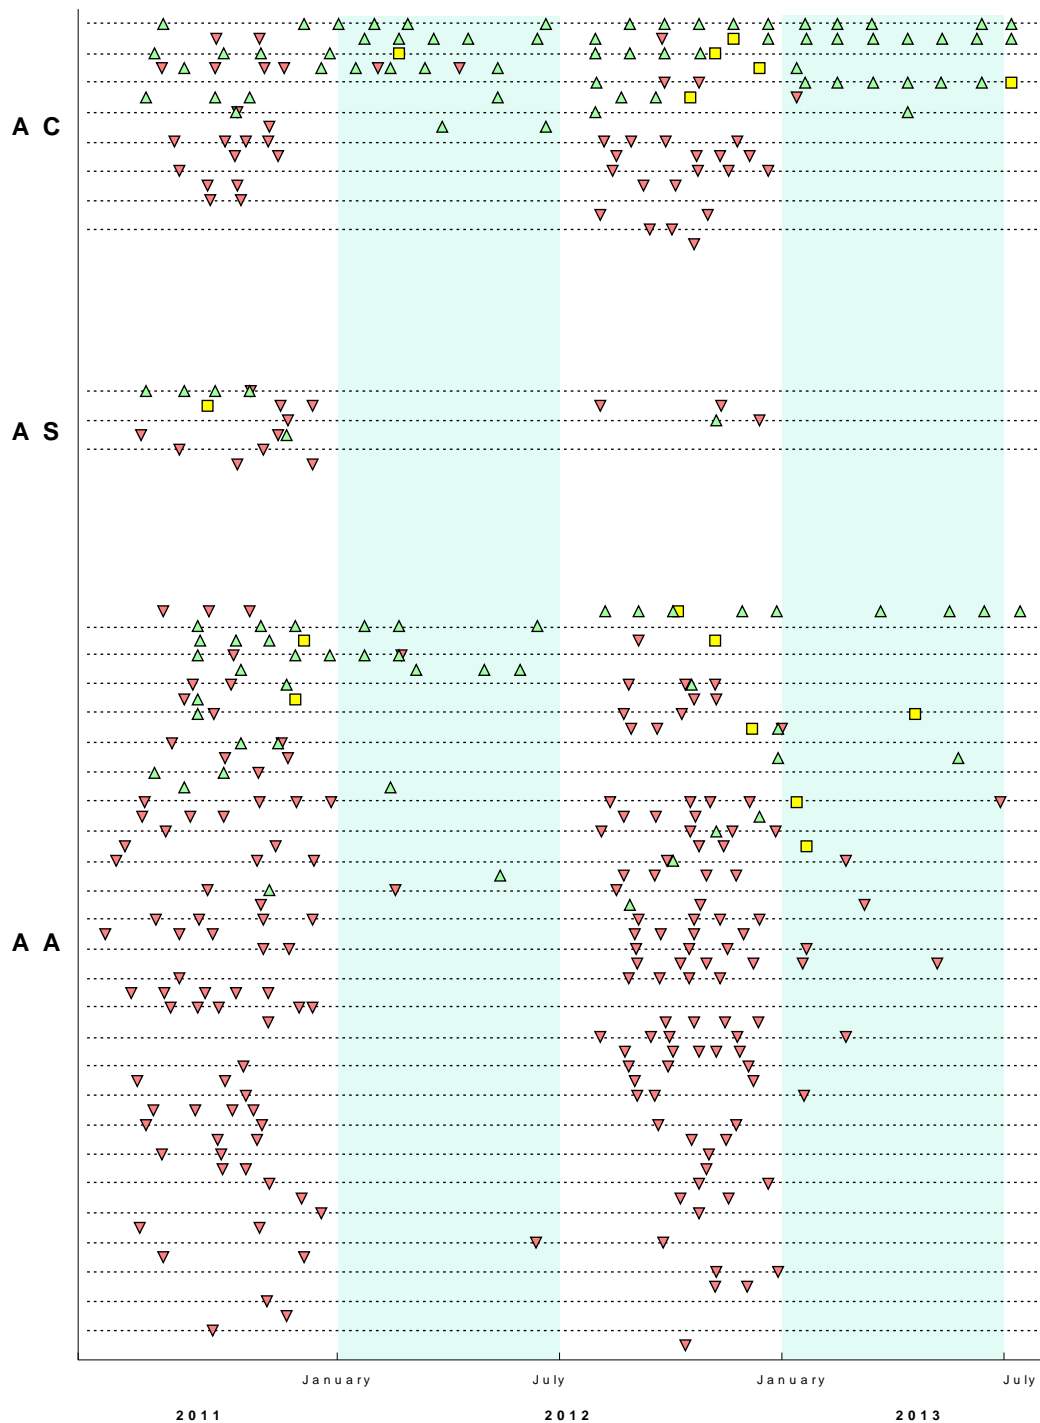

**Table S1. Age-specific mixed effects logistic models on parasite positivity by microscopy.** Results are adjusted for transmission season. Both scheduled and unscheduled visits were included in these analyses.

| <b>Children aged &lt; 5 years</b>     |    | <b>Odds ratio (95% CI)</b> | <b>P-value</b> |
|---------------------------------------|----|----------------------------|----------------|
| <b>Hemoglobin type</b>                |    |                            |                |
|                                       | AA | -                          | -              |
|                                       | AC | 0.76 (0.22 – 2.60)         | 0.66           |
|                                       | AS | 1.22 (0.29 – 5.15)         | 0.78           |
| <b>Children aged 5-15 years</b>       |    | <b>Odds ratio (95% CI)</b> | <b>P-value</b> |
| <b>Hemoglobin type</b>                |    |                            |                |
|                                       | AA | -                          | -              |
|                                       | AC | 3.01 (1.38 – 6.57)         | 0.006          |
|                                       | AS | 1.02 (0.32 – 3.26)         | 0.98           |
| <b>Individuals aged &gt; 15 years</b> |    | <b>Odds ratio (95% CI)</b> | <b>P-value</b> |
| <b>Hemoglobin type</b>                |    |                            |                |
|                                       | AA | -                          | -              |
|                                       | AC | 1.39 (0.91 – 2.13)         | 0.12           |
|                                       | AS | 0.50 (0.31 – 0.79)         | 0.003          |

**Table S2. Mixed effects linear regression on log-transformed asexual parasite levels.** Only visits with microscopically-detectable asexual falciparum parasites were included in this analysis. (A) Only scheduled visits without evidence of malaria symptoms were included (routine visits occurring 3 days or less after the onset of clinical symptoms were considered symptomatic); (B) Only scheduled or unscheduled visits classified as clinical malaria by study clinician were included.

(A)

|                            |                      | <b>Coefficients (95% CI)</b> | <b>P-value</b> |
|----------------------------|----------------------|------------------------------|----------------|
| <b>Hemoglobin type</b>     |                      |                              |                |
|                            | <i>AA</i>            | -                            | -              |
|                            | <i>AC</i>            | 0.25 (0.04 – 0.46)           | 0.02           |
|                            | <i>AS</i>            | -0.05 (-0.37 – 0.28)         | 0.78           |
| <b>Transmission season</b> |                      |                              |                |
|                            | <i>Low</i>           | -                            | -              |
|                            | <i>High</i>          | 0.34 (0.20 – 0.48)           | <0.001         |
| <b>Age at visit</b>        |                      |                              |                |
|                            | <i>&lt; 5 years</i>  | -                            | -              |
|                            | <i>5 – 15 years</i>  | 0.36 (0.07 – 0.64)           | 0.01           |
|                            | <i>&gt; 15 years</i> | -0.02 (-0.29 – 0.25)         | 0.88           |

(B)

|                            |                      | <b>Coefficients (95% CI)</b> | <b>P-value</b> |
|----------------------------|----------------------|------------------------------|----------------|
| <b>Hemoglobin type</b>     |                      |                              |                |
|                            | <i>AA</i>            | -                            | -              |
|                            | <i>AC</i>            | -0.20 (-0.48 – 0.08)         | 0.17           |
|                            | <i>AS</i>            | -0.27 (-0.65 – 0.11)         | 0.17           |
| <b>Transmission season</b> |                      |                              |                |
|                            | <i>Low</i>           | -                            | -              |
|                            | <i>High</i>          | 1.04 (0.66 – 1.42)           | <0.001         |
| <b>Age at visit</b>        |                      |                              |                |
|                            | <i>&lt; 5 years</i>  | -                            | -              |
|                            | <i>5 – 15 years</i>  | -0.06 ( -0.34 – 0.22)        | 0.68           |
|                            | <i>&gt; 15 years</i> | -1.17 (-1.45 – -0.89)        | <0.001         |

**Table S3. Age-specific mixed effects logistic models on gametocyte positivity.** All visits (scheduled and unscheduled) with microscopy results available were included in this analysis; when only scheduled visits are included, similar results are obtained.

| <b>Children aged &lt; 5 years</b>     |    | <b>Odds ratio (95% CI)</b> | <b>P-value</b> |
|---------------------------------------|----|----------------------------|----------------|
| <b>Hemoglobin type</b>                |    |                            |                |
|                                       | AA | -                          | -              |
|                                       | AC | 0.47 (0.02 – 11.06)        | 0.64           |
|                                       | AS | 10.94 (0.83 – 144.25)      | 0.07           |
| <b>Children aged 5-15 years</b>       |    | <b>Odds ratio (95% CI)</b> | <b>P-value</b> |
| <b>Hemoglobin type</b>                |    |                            |                |
|                                       | AA | -                          | -              |
|                                       | AC | 5.66 (1.28 – 24.96)        | 0.02           |
|                                       | AS | 3.49 (0.40 – 30.51)        | 0.26           |
| <b>Individuals aged &gt; 15 years</b> |    | <b>Odds ratio (95% CI)</b> | <b>P-value</b> |
| <b>Hemoglobin type</b>                |    |                            |                |
|                                       | AA | -                          | -              |
|                                       | AC | 1.66 (0.82 – 3.39)         | 0.16           |
|                                       | AS | 0.83 (0.38 – 1.85)         | 0.66           |



**Table S4. Mosquito skin feeding experiments.**

|                                                    | <i>First year</i>   | <i>Second year</i> |
|----------------------------------------------------|---------------------|--------------------|
| <b>Number of assays</b>                            | 95                  | 44                 |
|                                                    | <b>N (%)</b>        |                    |
| <b>Age (in years)</b>                              |                     |                    |
| < 5                                                | 10 (10.5)           | -                  |
| 5 – 15                                             | 40 (42.1)           | 10 (22.7)          |
| > 15                                               | 45 (47.4)           | 34 (77.3)          |
| <b>Hemoglobin type</b>                             |                     |                    |
| AA                                                 | 67 (70.5)           | 30 (68.2)          |
| AC                                                 | 20 (21.0)           | 10 (22.7)          |
| AS                                                 | 7 (7.4)             | 4 (9.1)            |
| SC                                                 | 1 (1.0)             | -                  |
| <b>Gametocyte positive</b>                         | 27 (29.3)           | 43 (97.7)#         |
| <b>Positive feeding assays*</b>                    | 13 (17.8)           | 17 (38.6)          |
|                                                    | <b>Median (IQR)</b> |                    |
| <b>Mosquitoes dissected per assay</b>              | 32 (20 - 42)        | 42 (38 - 46)       |
| <b>% of infected mosquitoes in positive assays</b> | 13.3 (9.1 - 22.9)   | 17.8 (10.0 - 62.9) |

\*Positive assays were those with at least one infected mosquito; only assays with at least 10 dissected mosquitoes are considered

#One individual had gametocytes detected only in the first of the three smear reads

**Table S5. Mixed effects Poisson models on infection and gametocyte positivity.** In these models, the number of scheduled visits each individual had during the follow-up was used as an exposure variable. (A) Model on infection incidence during scheduled visits; (B) Model on gametocyte incidence during scheduled visits (the association between AC genotype and gametocyte incidence was also observed when using a mixed effects negative binomial model with robust standard errors [data not shown]).

(A)

|                          |              | Incidence rate ratio (95% CI) | P-value |
|--------------------------|--------------|-------------------------------|---------|
| <b>Hemoglobin type</b>   |              |                               |         |
|                          | AA           | -                             | -       |
|                          | AC           | 1.46 (1.16 – 1.83)            | 0.001   |
|                          | AS           | 0.68 (0.48 – 0.96)            | 0.03    |
| <b>Age at enrollment</b> |              |                               |         |
|                          | < 5 years    | -                             | -       |
|                          | 5 – 15 years | 2.75 (2.13 – 3.55)            | <0.001  |
|                          | > 15 years   | 1.89 (1.48 – 2.40)            | <0.001  |

(B)

|                          |              | Incidence rate ratio (95% CI) | P-value |
|--------------------------|--------------|-------------------------------|---------|
| <b>Hemoglobin type</b>   |              |                               |         |
|                          | AA           | -                             | -       |
|                          | AC           | 2.80 (1.80 – 4.35)            | <0.001  |
|                          | AS           | 1.31 (0.71 – 2.42)            | 0.39    |
| <b>Age at enrollment</b> |              |                               |         |
|                          | < 5 years    | -                             | -       |
|                          | 5 – 15 years | 2.33 (1.48 – 3.67)            | <0.001  |
|                          | > 15 years   | 1.29 (0.83 – 2.01)            | 0.25    |

**Table S6. Number of study participants with blood smear results available during (A) the wet season of the year 2011 and (B) the dry season of the year 2012.**

**(A)**

|                  | <b>&lt; 5 years</b> |           |           | <b>5 - 15 years</b> |           |           | <b>&gt; 15 years</b> |           |           |
|------------------|---------------------|-----------|-----------|---------------------|-----------|-----------|----------------------|-----------|-----------|
|                  | <i>AA</i>           | <i>AC</i> | <i>AS</i> | <i>AA</i>           | <i>AC</i> | <i>AS</i> | <i>AA</i>            | <i>AC</i> | <i>AS</i> |
| <b>July</b>      | 32                  | 6         | 1         | 29                  | 5         | 5         | 32                   | 7         | 5         |
| <b>August</b>    | 76                  | 13        | 8         | 53                  | 12        | 6         | 53                   | 8         | 8         |
| <b>September</b> | 72                  | 13        | 8         | 53                  | 12        | 5         | 53                   | 8         | 9         |
| <b>October</b>   | 71                  | 13        | 7         | 53                  | 12        | 6         | 52                   | 8         | 8         |
| <b>November</b>  | 70                  | 11        | 8         | 52                  | 12        | 6         | 49                   | 9         | 7         |
| <b>December</b>  | 68                  | 11        | 8         | 55                  | 13        | 6         | 45                   | 8         | 8         |

**(B)**

|                 | <b>&lt; 5 years</b> |           |           | <b>5 - 15 years</b> |           |           | <b>&gt; 15 years</b> |           |           |
|-----------------|---------------------|-----------|-----------|---------------------|-----------|-----------|----------------------|-----------|-----------|
|                 | <i>AA</i>           | <i>AC</i> | <i>AS</i> | <i>AA</i>           | <i>AC</i> | <i>AS</i> | <i>AA</i>            | <i>AC</i> | <i>AS</i> |
| <b>January</b>  | 64                  | 9         | 5         | 56                  | 14        | 6         | 44                   | 7         | 8         |
| <b>February</b> | 66                  | 8         | 6         | 57                  | 15        | 6         | 47                   | 7         | 8         |
| <b>March</b>    | 59                  | 9         | 6         | 54                  | 15        | 6         | 46                   | 6         | 8         |
| <b>April</b>    | 60                  | 8         | 5         | 53                  | 15        | 6         | 41                   | 5         | 8         |
| <b>May</b>      | 57                  | 9         | 6         | 53                  | 15        | 6         | 45                   | 6         | 7         |
| <b>June</b>     | 32                  | 6         | 5         | 22                  | 9         | 1         | 17                   | 0         | 3         |
